# Supplementary material for: Overexpression of SMYD3 in Ovarian Cancer is Associated with Ovarian Cancer Proliferation and Apoptosis via Methylating H3K4 and H4K20
Source: PubMed Central journal article supplement (PMC6692630; doi:10.7150/jca.29861), 2019-07-08
Supplement: jcav10p4072s1.pdf [file jcav10p4072s1.pdf]

**Supplemental Table 1: Primers for RT-PCR**

| Gene   | Primer sequences (forward) | Primer sequences (reverse) |
|--------|----------------------------|----------------------------|
| CCNA2  | CTGGTGGTCTGTGTTCTGTGA      | TCTTGGATGCCAGTCTTACTCA     |
| CCNB2  | CGACGGTGTCCAGTGATT         | AGCCAAGAGCAGAGCAGT         |
| CCND2  | ATCACCAACACAGACGTGGA       | TGCAGGCTATTGAGGAGCA        |
| CDK1   | TAGCGCGGATCTACCATAACC      | CATGGCTACCACTTGACCTGT      |
| CDK2   | TCCAGGATGTGACCAAGCC        | CTGAGTCCAAATAGCCCAAGG      |
| WEE1   | GGCTCTGTTGATGAGCAGAACGCTT  | CTCAAGCCTCGGCGGCCAACTTGC   |
| CDKN2A | GCTGCCCAACGCACCGAATA       | ACCACCAGCGTGTCCAGGAA       |
| CDKN2B | AGTCAACCGTTTCGGGAGGCG      | ACCACCAGCGTGTCCAGGAAG      |
| CDKN3  | ATCACCCATCATCATCCAATCG     | TCTCCCAAGTCCTCCATAGCAG     |
| CDC25A | AGAACCCTATTGTGCCTACTG      | TACTCATTGCCGAGCCTATC       |
| CD40LG | CTCTTCCCTCCCCCAGTCTC       | AAGAAGAGAACTGACTAGCAACG    |
| GAPDH  | GGGAAGGTGAAGGTCGGAGT       | GGGGTCATTGATGGCAACA        |
| BIRC3  | CTTTGCCTGTGGTGGAAAAT       | ACTTGCAAGCTGCTCAGGAT       |
| SMYD3  | GGGCCACCTCTTACTGCGA        | CTGCTTCCGCGCTCCTCAC        |

### Supplemental Table 2: Primers for ChIP-PCR

| Gene   | Primer sequences (sense)     | Primer sequences (antisense) |
|--------|------------------------------|------------------------------|
| CDKN2A | ACAGGAGGGGAGCGGCCA           | CTCTGACGCGACATCTGGACAC       |
| BIRC3  | GGGAAATATGGCAGTGCAATTAGACTCA | CTTCTACTATAGCTGCAGAAGTCCAGC  |
